# Supplementary material for: Baicalin liposomes ameliorate cerebral ischemia-reperfusion-induced acute lung injury by modulating the inflammatory response
Source: Research Square preprint supplement (doi:10.21203/rs.3.rs-6059624/v1), 2025-03-03
Supplement: Supplementary file 1 [file 5b0e459e1b96989e97bbfdd6.xlsx]

## Sheet: p-PI3K
Figure5 B
	p-PI3K		β-actin

## Sheet: PI3K
Figure5 B
	PI3K		β-actin

## Sheet: p-AKT
Figure5 C
	p-AKT		β-actin

## Sheet: AKT
Figure5 C
	AKT		β-actin

## Sheet: p-mTOR
Figure5 D
	p-mTOR		β-actin

## Sheet: mTOR
Figure5 D
	mTOR		β-actin
